# Supplementary material for: Threat management priorities for conserving Antarctic biodiversity
Source: PLoS Biol. 2022 Dec 22;20(12):e3001921. doi: 10.1371/journal.pbio.3001921 (PMC9778584; doi:10.1371/journal.pbio.3001921)
Supplement: S1 Data — (XLSX) [file pbio.3001921.s001.xlsx]

## Sheet: READ_ME
S1 Data. Proposed management strategies for conserving Antarctic biodiversity to the end of this century, detailing strategy objectives, specific actions that make up the strategy, costs and feasibility of each action.
Assumptions/ Notes:
Current and today refer to the state of the Antarctic environment and associated management undertaken in 2017.
Actions are listed in chronological order (top of the list generally is the first action to be undertaken)
We generally assumed there are:
35 seasonal stations and 45 year-round current stations (based on ‘Year-round’ and ‘Seasonal’ stations in the COMNAP facilities layer) 30 National Programs (operating) 83 years (until 2100) – If an action occurs every 10yrs then the cost would be multiplied by (83/10) etc Workshops – generally assumed a workshop cost AU$100k unless specified otherwise in the cost details (large workshop = $200k) …
Costs are split into 3 categories: x number of FTE hours + y number of berths + z $AUD in other costs
Full time equivalent (FTE) – split into two categories: OFC FTE (Office FTE, not in Antarctica) – Cost: $77.3k salary (average of estimates from IPEV/BAS/AAD/JARE) ANT FTE (Antarctic FTE) – Cost: $128.8k (average of estimates from IPEV/BAS/AAD/JARE)
One berth includes: Everything for the field season for 1 person that a National Program would provide, e.g. plane to port, berth to continent, food, beds on station etc. But does not include specialised field equipment/operations etc – that comes under $$ costs.
Split berths into three categories: SSUM berth (short summer berth) – 6wks on the continent – Cost: $79.6k (average of estimates from IPEV/BAS/AAD/JARE). Assume 0.25 ANT FTE (3mths) required LSUM berth (long summer berth) – 12wks on the continent – Cost: $144k (average of estimates from IPEV/BAS/AAD/JARE). Assume 0.5 ANT FTE (6mths) required Winter berth – year on the continent – Cost: $404.5k (a…
Converted costs to AUD as per following: 1£ = 1.8 AUD 1€ = 1.6 AUD 1 USD = 1.4 AUD 1¥ = 0.013 AUD *Costs in the main text converted to USD
Converted costs to USD for main text and analyses as per following: 1 AUD = 0.71 USD 1€ = 1.14 USD 1£ = 1.29 USD 1¥ = 0.00929 USD
Approximate Total Cost by 2100 Approximate total costs have not yet been ‘discounted’. In the benefits analysis, costs over time are discounted, where it is assumed that the money needed for future actions (e.g. in 50yrs time) is invested somewhere else now and is gaining value/interest, e.g. a trust fund. The investor does not necessarily need to have the total amount of money needed for the str…
Cost Range A number of actions have a cost range depending on various factors outlined in the action details/ assumptions made (eg. the potential number of invasive species that could establish, or whether it will take 2 or 10 FTE for a job). When a range is presented in the cost column, it is the range of minimum-maximum price expected for that action: E.g. if there are ~ 1 - 5 occurrences of ac…
Acronyms FTE – Full Time Equivalent, OFC FTE – Office FTE (not in Antarctica), ANT FTE – Antarctic FTE (based in Antarctica), SSUM berth – Short summer berth (6wks), LSUM berth – Long summer berth (12wks), Winter berth – Year berth (52wks), NAP – National Antarctic Program.
There are two likelihoods: Likelihood of uptake of actions: the likelihood that decision makers will agree to implement the action as it’s described it [estimated per action]. Likelihood of uptake assumes that funding for the action is already available (i.e. likelihood of sourcing money is excluded from this estimate). Likelihood of success of strategies: assuming all the actions are taken, the …

## Sheet: S1_Baseline
Strategy	Approximate total cost ($USD)	Likelihood of success (%)	Threat	Objective and details	Action	Details and cost over time	Approximate total cost of action by 2100	Likelihood of uptake (%)
Business as usual (Baseline)	0	NA	NA	Continue with actions and strategies currently in use, but neither expand on these strategies nor employ new strategies. Baseline against which to measure other strategies. As per today (2017).	As per today	NA	NA	100

## Sheet: S2_Remediation
Strategy	Approximate total cost ($USD)	Likelihood of success (%)	Threat/s	Objective and details	Action	Details and cost over time	Approximate total cost of action by 2100	Likelihood of uptake (%)
Remediation	$240M	60	Pollution (local) Human activities (habitat degradation)	Increase amount of or improve quality of habitat available to biodiversity in comparison to habitat currently available. By remediating 20 environmentally damaged (physically, chemically, biologically) sites (including freshwater) that will provide the greatest benefit to biodiversity, including remediation of legacy waste sites if necessary. (This strategy is likely to be important for co-benefi…	1 - Encourage adoption and implementation of Annex 6 (to facilitate establishment of consequences for contributing to environmental emergencies, particularly when due to negligence or disregard). Will also help prevent the creation of new sites requiring remediation in future	Actively engage with National ATCM Delegations to advocate for the Adoption of Annex 6 – 0.1FTE/yr per program for next 5 years 0.1 * 30 * 5	15 OFC FTE TOTAL $1.2M	85
					2 - Collate existing information - Gather data on potential remediation sites and habitat, species, and history of impacts, including freshwater (identify gaps in existing info and fill if possible)	6 months OFC FTE every 10 years (83/10 = 8.3) (0.5FTE * 8.3) = 4.15FTE	4.15 OFC FTE TOTAL $321k	100
					3 - Prioritise – Develop guidance and framework for best practices, THEN each party prioritise among the sites that they have impacted (estimating there are ~120 current sites and about ~80 historic sites, some formally protected)	1 year OFC FTE every 10 years (1 * 8.3)	8.3 OFC FTE TOTAL $642k	100
					4 - Develop best practice remediation techniques for online manual - ongoing updates (build on clean up manual, and include info from Arctic). Assume future impacts also dealt with.	1FTE OFC for first year, 0.25FTE ongoing 1 + (0.25 FTE * 83yrs)	21.75 OFC FTE TOTAL $1.7M	90
					5 - Environmental Impacts assessment	Estimate it costs $36k (20,000 GBP) / EIA à 20 best sites $36k * 20 = 720k	720k TOTAL $720k	90
					6 - On ground remediation (use existing info on past restorations to inform)	Remediate 10 in the next 20 years, another ten done by 50 years, ~1-10 million cubic metres in total (split 50/50 between maritime and continent). Estimate $10M per remediation event ($10M * 20 sites)	$200M TOTAL $200M	80
					7 - Ongoing monitoring and evaluation (use existing info) *assume natural recolonisation	5 teams of 2ppl assess 4 sites each over a season, every 5 years. 0.5FTE *2 * 5 (4 sites each) every 5 years + 2 * 5 * (83/5) LSUM berths + $50k * (83/5) lab costs for post field processing	83 ANT FTE + 166 LSUM berths + $830k lab costs TOTAL $35.4M	80

## Sheet: S3_Exist_infra
Strategy	Approximate total cost ($USD)	Likelihood of success (%)	Threat	Objective and details	Action	Details and cost over time	Approximate total cost of action by 2100	Likelihood of uptake (%)
Manage existing infrastructure	APPROX COST RANGE = $1,763.2M – 1,970.2M i.e. $1.763B– 1.97B APPROX TOTAL COST = $2.165B	90	Pollution (local) Human activities (habitat degradation, physical impacts, disturbance)	Reduce and minimise impacts of existing infrastructure compared to current levels	1 - Strengthen EIA process for any significant activity that could damage biodiversity (e.g. at each station). Improve communication from plan to implementation and consultation with biodiversity experts (note: biodiversity experts are often consulted too late).	1 FTE Env. manager per NAP forever, 0.75 of time in office, 0.25 in Antarctica. 1 LSUM berth required each year per NAP (this may be conservative as some NAP’s may already have an Env. Manager). 0.75 OFC FTE x 30 NAPs x 83 years + 0.25 ANT FTE x 30 NAPs x 83 years + 30 LSUM berths * 83 years	1868 OFC FTE + 623 ANT FTE + 2490 LSUM berths TOTAL $583.2M	60
					2 - Develop reference guide for standard practice for assessing and monitoring biodiversity and the environmental state in the vicinity of stations in the context of undertaking an EIA. SCAR to assist.	1 large initial workshop and 2 OFC FTE worth of time to compile standard reference guide. $200k large workshop + 2 OFC FTE + 1 workshop and 0.5 OFC FTE every 5yrs to revise guidelines 2 + 0.5*(83/5) FTE $200k + $100k*(83/5) = 10.3 FTE + 1.86M	10.3 OFC FTE + $1.86M TOTAL $2.7M	80
					3 - Undertake EIA - Identify biodiversity around station limits and field camps with the goal of establishing baseline, map, and producing a station biodiversity plan	Every 10 years and per station, including summer stations: 1 Season: 1 project manager per NAP to prepare pre-field (3mths) and analyse/report post field (6mths) (0.75 OFC FTE) 4 field assistants (0.25 * 4 ANT FTE) per station 4 SSUM berths per station 4 research assistants post field collection to identify and quantify data (0.25 * 4 OFC FTE) per station Field equipment (e.g. drones) $50k per NA…	851 OFC FTE + 664 ANT FTE + 2656 SSUM berths + $24.9M Lab/equipment costs TOTAL $387.6M	40
					4 - Identify areas that need restoration/remediation	Initial year and every 10 years per station: Consultancy work over 1 year, team of 1 engineer + 1 hydrologist + 1 env Chemist (pollutant expertise) + 1 biologist. (4 * 0.5 FTE for 1 season, + $50k lab costs/season per NAP) 0.5 * 4 ANT FTE * 80 stations + 0.5 * 4 ANT FTE * 80 stations * (82/10 years) = 160 + 1312 ANT FTE + 4 * 80 + 4 * 80 * (82/10) LSUM berths = 320 + 2624 LSUM + $50k * 30 NAP +$5…	1472 ANT FTE + 2624 LSUM berths + $13.8M lab costs TOTAL $581.3M	50
					5 - Implementation of restoration and remediation Estimate each station has identified approx. 5 sites that need remediating in their vicinity (particularly those built pre-protocol). Assuming they remediate these evenly over the time period, it will occur once every 16.6yrs	Frequency ~ once every 17 years for each station: clean-up/remediation of a site costs between $500K-$1M Note: have not incorporated cost of removing an entire station, though this could happen into the future. 500k – 1M * 80 stations * 83/16	$207.5M – $415M TOTAL $208M - $415M	20
					6 - Monitoring the impact of roads/stations/buildings (including calculating station footprint), to help improve management	Costs covered by actions #3 & #4 above – same group of people identifying new areas for remediation/restoration can also monitor impacts of roads/stations/buildings.	0 TOTAL $0	50
					7 - Socialise the idea; secure assistance and advice for implementation – will help with actions: EIA, monitoring at stations	4 workshops with COMNAP. Supported within margins of regular COMNAP/IAATO meetings $100K/workshop, every 20 years 100 * 83/20 years	$415k TOTAL $415k	100
					8 - Rank/identify most important action to implement locally (prioritisation) – and communicate this effectively	Can be implemented by NAP Env Manager (Action #1) No new cost	0 TOTAL $0	0
					9 - Shared facility discussions through COMNAP and SCAR	Negligible cost, existing business activity	0 TOTAL $0	100

## Sheet: S4_New_infra
Strategy	Approximate total cost ($USD)	Likelihood of success (%)	Threat	Objective and details	Action	Details and cost over time	Approximate total cost of action by 2100	Likelihood of uptake (%)
Manage new infrastructure	$112.7M	90	Human activities (habitat degradation, physical impacts, disturbance)	Prevent, reduce and minimise impacts of new infrastructure Note: this strategy is relevant for new stations/ new ski ways/ new landing sites/ or significant infrastructure in existing station. The expected number of new big /significant infrastructure is estimated to be 2 every 5 years (33 new stations total) We build this strategy based on the previous strategy ‘Manage existing infrastructure’ a…	1 - Compile standard reference guide for new infrastructure including how to undertake CEE (comprehensive environmental evaluation). Strengthen the CEE process for any significant activity that could damage biodiversity. Improve communication from plan to implementation and consultation with biodiversity experts (note: biodiversity experts are often consulted too late)	1 large initial workshop and 2 OFC FTE worth of time to compile standard reference guide. $200k large workshop + 2 OFC FTE	2 OFC FTE + $200k TOTAL $354.6k	80
					2 - Undertake CEE Identify biodiversity around new station (infrastructure) limits and expected satellite camps with the goal of establishing baseline, map, and producing a station biodiversity plan (action #3 in ‘existing infrastructure’). Identify areas where new technology can be used to lessen impacts.	Initially per new station (assume some CEE’s may take longer and some shorter, balancing out to be around 6mths field work x4 people + 1FTE of office hours). 1 Season: - 1 project manager per NAP to prepare pre-field (3mths) and analyse, undertake assessments post field (9mths) (1 OFC FTE) -4 field assistants (0.5 * 4 ANT FTE) per station - 4 LSUM berths per station - 4 research assistants post f…	66 OFC FTE + 66 ANT FTE + 133 LSUM berths + $3.3M lab/field TOTAL $36M	40
					3 - Undertake regular EIA’s to ensure information is up to date and accurate - Identify biodiversity around station limits and field camps. Monitor impact of roads/stations/buildings (including calculating station footprint), to help improve management	Every 10 years and per station: - 1 project manager per station to prepare pre-field (3mths) and analyse/report post field (6mths) (0.75 OFC FTE) - 4 field assistants (0.25 * 4 ANT FTE) per station. Ensure team includes 1 engineer + 1 hydrologist + 1 env Chemist (pollutant expertise) + 1 biologist. - 4 SSUM berths per station - 4 research assistants post field collection to identify and quantify …	196 OFC FTE + 112 ANT FTE + 448 SSUM + $11.2M lab costs TOTAL $76.5M	45
					4 - Shared facility discussions through CONMAP and SCAR to reduce pressures on environment and collaborate more effectively (action #9 in ‘existing infrastructure’)	Negligible cost, existing business activity	0 TOTAL $0	100
					5 - Manager to explore/implement use of new technology to reduce impact on biodiversity (make this a requirement)	No additional cost, could be covered by action #1	0 TOTAL $0	70

## Sheet: S5_Transport
Strategy	Approximate total cost ($USD)	Likelihood of success (%)	Threat	Objective and details	Action	Details and cost over time	Approximate total cost of action by 2100	Likelihood of uptake (%)
Transport Management	$112.3M	90	Human activities (physical impacts, disturbance) Pollution (local)	Reduce and minimise impacts of transport compared to current levels	1 - Site selection optimisation for science (NAP) and tourist landings (link with data to be collected around stations). Science transport includes research operational and logistic support transport (incl. transport for facilities)	Every 5 years: 2 OFC FTE (1 continent, 1 peninsula) + 2 SSUM berths for ground-truthing 2 OFC FTE * (83/5yrs) + 0.25 * 2 ANT FTE * (83/5) + 2 SSUM berths * (83/5)	33 OFC FTE + 8 ANT FTE + 34 SSUM berths TOTAL $6.3M	90
					2 - Prevent/reduce contamination/pollution of: local black carbon, noise pollution, wildlife disturbance, fuel contamination, soil compaction, landscape disturbance & dust	Permanent manager in charge of finding/implementing solutions per national program (+ IAATO), spends half their time doing this (0.5FTE) 0.5 OFC FTE * 31 programs (incl IAATO) * 83years	1287 OFC FTE TOTAL $99.5M	50
					3 - Following and updating technological development when possible (less pollution, smarter, safer) e.g. use drones instead of helicopters to collect data or transport small packages between stations/ field camps. Cost saving potential (save fuel etc)	1 FTE for the continent in charge of following/testing new technology for more efficient transportations (as part of the air group COMNAP) 1 OFC FTE * 83years	83 OFC FTE TOTAL $6.4M	100

## Sheet: S6_Non-natives
Strategy	Approximate total cost ($USD)	Likelihood of success (%)	Threat	Objective and details	Action	Details and cost over time	Approximate total cost of action by 2100	Likelihood of uptake (%)
Manage non-native species and disease	APPROX COST RANGE = $1,771.4M – 2,077.3M i.e. $1.77B – 2.08B APPROX TOTAL COST = $1.983B	85	Non-native species and disease	Reduce impacts of non-native species and disease on native biodiversity. Where possible prevent establishment of new populations of non-native species. Eradicate or, if not possible, minimise impacts of established non-native species.	1 - Collate information, undertake gap analysis and produce guidelines for baseline biodiversity surveys. Target those groups and locations we don’t know very much about (cross reference to ANTOS survey programs and EGBAM health monitoring group).	3 OFC FTE	3 OFC FTE TOTAL $232k	100
					2 - Biodiversity surveys Baseline surveys needed to better understand distributions and abundance and population structure of native species, at an appropriate level of taxonomic resolution, including better categorising viral, microbial, and parasitic communities	150 FTE’s across 15 National Programs (Approximately 30 sites) across 10 years: 2 ppl for 3-6 seasons for each broad biodiversity group (6 groups) for each site (30 sites) = 540 - 1080 FTE (spread over 25 years. i.e. start surveys within 10 years, finish most within 25 years) + $50k lab costs /site for processing samples Assume the cost is spread evenly over the 25 years: 0.5 * 2 ANT FTE * 6 bio …	540 - 1080 ANT FTE + 1080 – 2160 LSUM berths + $1.65M lab costs TOTAL $226.7M – 451.8M	60
					3 - Design and implement (and recognise the limitations of) a robust invasive species recognition framework/ guideline	0.5 FTE straight up another 0.5 after each broad biodiversity group has been done (3 FTE in total) over the course of the surveys ~20 years (yrs 5 – 25)	3 OFC FTE TOTAL $231.9k	90
					4 - Research to better understand disease pathways (introductions to continent) [as we know even less about disease pathways than most subjects]	1FTE for 3 years (i.e. PhD/Postdoc project)	3 OFC FTE TOTAL $231.9k	95
					5 - Research to better understand how to effectively control or remove non-native invertebrates (reasonably well understood for flora). Include chemical and alternative methods.	1FTE for 3 years (i.e. PhD/Postdoc project)	3 OFC FTE TOTAL $231.9k	95
					6 - Develop and revise ATS instruments to implement and improve management practices/guidelines. Increase communication to and between relevant policy bodies (CEP, CCAMLR, COMNAP, ACAP, SCAR etc) and National Parties. Instruments include EIA’s, chemical control, developing consensus around importance of microbial biosecurity, and developing guidelines for monitoring different taxonomic groups and…	Workshops (potentially facilitated or coordinated by SCAR) to bring together appropriate people (could then disseminate info to parties etc). One large workshop straight up, then one every 5 years for next 20 years. ($200k for first wkshp, then $100k/wkshp = $600 K total). 3 FTE to begin and then 1 FTE each time to prepare workshop and write/revise/update guidelines post-workshop. 3 FTE + 1 FTE *…	$600k 7 OFC FTE TOTAL $1.1M	80
					7 - Improve pre-departure biosecurity and inspection (cargo, vessel, personnel). Potentially not relevant for every program (some may be considered to be adequate after recent facility upgrades/ updates of procedures etc)	1 FTE per NAP program each year (ongoing), though not all programs need one (i.e. already have one) estimate approx. 20 programs need one. Also allocate these managers 3 FTEs for 6mths to assist with carrying out checks/cleaning. Budget $100k/p.a. per program for other costs such as pre-departure treatments and chemicals. Assume that time spent by researchers/staff cleaning personal gear and equi…	4150 OFC FTE + $16.6M TOTAL $337.4M	50
					8 - Design and build dedicated biosecurity facilities (for those programs that are large enough to require one and do not already have one)	Estimate 10 NAPs will need new biosecurity facility (such as the Hobart facility at Macquarie Point) – some are too small to require one, some have one (e.g. Australia) and some can possibly share (e.g. Chilean and British programs departing from Punta Arenas). $2M per facility (cost estimate based on the build cost of the AAD’s facility in Hobart) $2M * 10 NAPs	$200M TOTAL $200M	50
					9 - Develop and implement guidelines for preventing the inter and intra-regional movement of species via human movement (native and non-native). Look at past literature to help develop guidelines. Include microbes. Assume relevant to every (30) NAP	2 years FTE (e.g. a PhD/Postdoc project) to develop guidelines. Budget a further $50k/p.a. per program for implementation costs (equipment and chemical costs for cleaning clothing/equipment/vehicles between locations) and 0.3 ANT FTE per program per annum to coordinate inspections and cleaning of clothing/equipment/vehicles (assume berth is accounted for in person/s other role). Assume that time …	2 OFC FTE + 747 ANT FTE + $124.5M TOTAL $220.9M	100
					10 - Pro-actively engage in order to educate all treaty parties and operators. Probably best done through COMNAP and to a lesser extent the CEP. IAATO and many programs already doing this.	Write a WP every two years to CEP/COMNAP (0.3 FTE) for next 10 years, then every five years thereafter. SCAR/COMNAP workshop every 5 years for next 20 years (@100K each = $500K) (0.3 * 5) + (0.3 * (73/5))	6 OFC FTE + 500k TOTAL $964k	80
					11 - Compliance monitoring and reporting for National Programs. Could be implemented by the ATS, similar to fisheries monitoring by CCAMLR. Monitoring/inspections could be undertaken by National Authorities.	2FTE initially to devise reporting guidelines and submit to ATS. 0.2FTE per program per year ongoing (i.e. 6FTE/yr for 30 programs) to undertake biosecurity monitoring and reporting. 2 + (6 * 83)	500 OFC FTE TOTAL $38.7M	20
					12 - Advise and encourage non-IAATO vessels to follow biosecurity guidelines. IAATO already has strict procedures so best option is to encourage joining IAATO, failing that – dissemination of NNS guidelines to parties	1 FTE per 5 years for 20 years, including flights/train etc (~$40K every 5 years) (have someone travelling around presenting to and meeting with different parties) 1 OFC FTE * 5 + $40k * 5	5 OFC FTE + 200K TOTAL $586.5k	60
					13 - Designated biosecurity officers stationed on IAATO operated vessels. IAATO well placed to hire and roster the officers (cost could be offset by hiring staff also qualified to guest lecture etc)	Assume 30 officers for the season (assume 3mths Dec/Jan/Feb) – rotating vessels if more than 30 vessels. Assume each person does an average of 3 trips per season (@$12.5k berth per trip). $12.5k used as an average of $10-$15k for an IAATO staff on IAATO vessel 0.25 ANT FTE * 30 people * 83yrs + 30 ppl * 3 IAATO berths @$12.5k * 83yrs	623 ANT FTE +$93.34M in berths TOTAL $173.6M	30
					14 - Encourage adoption and implementation of Annex 6 (to facilitate establishment of consequences for contributing to environmental emergencies, including non-native species, particularly when due to negligence or disregard)	Actively engage with National ATCM Delegations to advocate for the Adoption of Annex 6 – 0.1FTE/yr per program for next 5 years 0.1 * 30 * 5	15 OFC FTE TOTAL $1.2M	85
					15 - If necessary (pending eradication research) - Engage with ATS to consider amendment to Annex III of the Environment Protocol for the use of pesticides in regards to non-native species in the Antarctic. Potentially the only effective and cost-efficient method for controlling some non-native species.	Actively engage with National ATCM Delegations to consider Annex III amendment pending research outcomes – 0.1FTE/yr per program for 5 years post completion of research (years 5-9) 0.1FTE * 5yrs *30yrs	15 OFC FTE TOTAL $1.2M	75
					16 - Monitor for arrival and establishment of non-native species according to guidelines. Undertake regular monitoring, determine whether biosecurity measures are working. Citizen science project – take photos and send in to experts via an app (targeted at plants and large inverts), also good way to engage the public	0.5 FTE (biosecurity expert) each year per NAP field based  ongoing (30 NAP). Develop and maintain citizen science app and encourage data collation 1FTE to establish, 0.2 FTE ongoing 0.5 * 30 * 83 ANT FTE + 1 + 0.2 * 83 OFC FTE app + 1 * 30 * 83 LSUM berths + $50k * 30 * 83 lab costs	1245 ANT FTE + 18 OFC FTE + 2490 LSUM berths + $124.5M lab costs TOTAL $644.8M	50
					17 - Identify and create an expert advisory group through SCAR to provide a rapid response to new incursions. Utilise expertise within SCAR (potentially through SCATS in the first instance) to provide advice on optimal responses to new incursions	0.1 FTE ongoing, initial establishment of 0.3 FTE. Can build on and utilise the current CEP non-native species portal held by the AADC 0.1 * 83 + 0.2	9 OFC FTE TOTAL $695.7k	100
					18 - Eradicate non-native flora or fauna with a small extent. Remove non-native species using mechanical removal (flora) and/or controlled chemical removal (flora/fauna) if occupies small extent AND if changes allowing chemical use were approved in Annex III. Expectation is to remove unless removal causes more damage (where removal would result in a greater adverse environmental impact), in which…	Estimate between 80-160 incursions by 2100. [NOTE: expect rate to increase over time as monitoring increases and as climate warms]. Estimate eradication requires 2 people for a short summer season each time, including eradication and pre-post assessment. Estimated based on time/personnel documented in two recent publications: - Pertierra et al. 2017 (Polar Biology) – eradicated a small patch of p…	40 – 80 ANT FTE + 160 – 320 SSUM berths TOTAL $17.9M – 35.8M	70
					19 - Eradicate non-native flora or fauna with a large extent. Remove non-native species using containment/controlled chemical removal	Estimate 8-16 incursions. Low number of incursions as shouldn’t get to this stage if small incursions are eradicated (action #18). Cost estimated based on times given in Galera et al. 2017 (Polar Biology). 4 people on the ground for 3mths for 2 seasons in a row. 0.25 * 4 ANT FTE * 2seasons *(8-16) + 4 ppl * 2 seasons * 8 – 16 SSUM berths	16 – 32 ANT FTE + 64 – 128 SSUM berths TOTAL $7.2M – 14.3M	40
					20 - Manage non-native flora or fauna with a small area. When it is not possible to remove non-native species, control species to site of establishment and prevent expansion (e.g. biosecurity, boundaries etc), monitor	Only applicable if can’t be eradicated. Estimate 10-20 incursions (assume half of incursions occur before 2050 and half after 2050 and occur at an even rate). 0.5 FTE initially (likely specialist) and then 0.2 FTE ongoing per non-eradicated incursion (10-20). Assuming berths can generally be accounted for by other station jobs, but say 0.2 of the berth cost can be accounted for here (0.5FTE * (10…	136 – 272 ANT FTE + 133 – 266 SSUM berths TOTAL $28.1M – 56.2M	85
					21 - Manage non-native flora or fauna with a large area. When it is not possible to remove non-native species, control species to site of establishment and prevent expansion, and monitor (may only be possible for flora)	Again, only applicable if can’t be eradicated. Hopefully, will only be necessary a few times if prior actions are all implemented. Therefore estimate 4-8 events. Initial 0.5 FTE per incursion and 0.4 FTE ongoing for 4-8 incursions, assuming half before 2050 and half after (even rate of occurrence). Assuming berths can generally be accounted for by other station jobs, but say 0.4 of the berth cost…	107 – 214 ANT FTE + 105 – 210 SSUM berths TOTAL $16.6M – 44.3M	30

## Sheet: S7_Protect_veg
Strategy	Approximate total cost ($USD)	Likelihood of success (%)	Threat	Objective and details	Action	Details and cost over time	Approximate total cost of action by 2100	Likelihood of uptake (%)
Protect vegetation from physical impacts	APPROX COST RANGE = $52.2M – 122.8M APPROX TOTAL COST = $88.4M	65	Human activities (habitat degradation, physical impacts) Native species	Reduce physical impacts of human activities and native vertebrate activities on vegetation. Halt the decline (or loss) of vegetation and associated taxa due to direct physical damage/impact at key sites (e.g. fur seal damage). Note: Strategy assessed only for the Antarctic Peninsula	1 - Terrestrial ecosystem assessment (i.e. coastal areas). Mostly relevant for maritime region. Surveys needed to quantify impacts on habitat (current and future) – choose several representative sites across peninsula and islands and tie in with remote sensing surveys (could potentially link with proposed ANTOS sites)	3 FTE (6 people in field [3x teams of 2] for a summer, and then analyse and draft reports) + $50k lab processing costs post fieldwork 0.5 * 6 ANT FTE + 6 LSUM berths + $50k lab	3 ANT FTE + 6 LSUM berths + $50k lab costs TOTAL $1.3M	80
					2 - Identify suitable sites for active management to protect/ recover terrestrial ecosystems. Use remote sensing and existing knowledge to locate potential sites and then ground truth with field team	Identify 1-3 sites for management (every 5yrs ongoing) – 1 FTE (1person to review remote data for 6mths & analyse samples, field team of 2 for a short summer to ground truth) + high-res satellite images ($1000 per site). Assume images needed for 100 sites initially and another 10 required every 5 years + $50 field lab costs each season 0.5 OFC FTE * (83/5yrs) + 0.25 * 2 ANT FTE * (83/5yrs) + 2 * …	8 OFC FTE + 8 ANT FTE + 34 SSUM berths + $1.1M images & analysis TOTAL $5.5M	60
					3 - Develop active management plan for suitable sites. Including maintenance costs (e.g. maintaining barriers)	0.25FTE per site to develop management plan and have it reviewed every 5 yrs. (assume 1-3 sites need to be reviewed every 5yrs, ongoing). 0.25 – 0.75 OFC FTE * (83/5)	4 – 12 OFC FTE TOTAL $309.2k – 927.6k	50
					4 - Implement management plan and monitor effectiveness. Active management to prevent/recover damage, e.g. barriers, new technology (develop if possible), etc. Monitor effectiveness of active management and watch for adverse outcomes	2.5FTE/site for the 1st short summer (10 people per site to manage the site/ build fences) + $100k per site equipment. 0.5 FTE ongoing for following 4yrs (2 people/site for a short summer to fence/ monitor effectiveness). At which point management is reviewed (and either continue managing site or select new site for management). Repeat for next 83yrs, assuming minimum of 1 site at all times and m…	75 – 224 ANT FTE + 299 – 896 SSUM berths + $11.6M – 14.9M equipment/lab TOTAL $45.1M – 115.1M	40

## Sheet: S8_Protect_areas
Strategy	Approximate total cost ($USD)	Likelihood of success (%)	Threat	Objective and details	Action	Details and cost over time	Approximate total cost of action by 2100	Likelihood of uptake (%)
Protecting areas	COST RANGE = $224.3M – 747.3M APPROX TOTAL COST = $334.9M	95	Human activities	Reduce impacts of human activities on biodiversity by increasing the amount and representation of habitat in protected areas. Develop the Antarctic Specially Protected Area system to improve representation of the values specified in the Environment Protocol and ensure the network incorporates contemporary systematic conservation planning pillars	1 - Design systematic suite of candidate sites using best available information and gap analyses, first cut using existing data	3-4 FTE in the initial cut, 1 FTE thereafter every 5 years to review/update 4 + (83/5) OFC FTE	21 OFC FTE TOTAL $1.6M	100
					2 - Validate proposed sites (survey - remote sensing, visits, emerging technologies with low impact), and potentially follow up on sites/taxa identified in the gap analysis that require more information. Also collect additional information required for developing Management Plan. In order to cost the actions, estimate that somewhere between 36 and 144 new ASPAs are identified for designation (mid…	3-4 summer season berths per site + $50k lab processing costs each season + initial high-res remote sensing images (50 sites). Remote sensing to include drones and satellites for different scales. Assume a max 6 sites can be validated per season (therefore requires between 36/6 – 144/6 seasons). Assume validation seasons spread evenly over the 83yr time period. 0.25 * 4 ANT FTE * 36 - 144 sites +…	36 - 144 ANT FTE + 144 - 576 SSUM berths + $350K – 1250K lab costs TOTAL $16.5M – 65.7M	90
					3 - Designate – start with sites known to be important using existing knowledge. Devise Management Plan, present to CEP (need to agree) and aggregate into ASPA network management. Ensure Management Plan accounts for potential risks/threatening processes such as climate change, physical impacts (e.g. human activity, fur seals), etc, and includes plans to mitigate/manage these	3-4 FTEs for first cut (devising template), then 1 thereafter per each new plan (assume 36 – 144 new ASPAs). Assume FTE cost is evenly spread over years 2-83. 4 + (35 – 143)	39 - 147 OFC FTE TOTAL $3M – 11.4M	60
					4 - Monitoring surveys – (remote sensing, visits, emerging technologies). Consider state of biodiversity and other values	Monitor each new site every five years for the first 20 years and then once every 10years: 2ppl 1 season in the field (incl lab work). Assume half have been designated prior to 2050 and half after. ((0.5FTE * 2ppl) * 18-72 sites * (4 + (83-20/10yrs))) + ((0.5FTE * 2ppl) * 18-72 sites * (4 + (50-20/10yrs))) (2ppl * 18-72 sites * (4 + (83-20/10))) + (2ppl * 18-72 sites * (4 + (50-20/10))) berths + …	311 – 1246 ANT FTE + 623 - 2491 LSUM berths + $15.57M - 62.28M lab costs TOTAL $145.3M – 581.5M	50
					5 - Managing ASPA’s Responsibility of all Parties (National Authorities): managing people, undertake EIA and check visit reports prior to visit, regulate access if required	Approximately 1 person per national program for 3mths to handle permitting/checking previous visit reports etc for ASPA visits, ongoing. 0.25 * 30 * 83	623 OFC FTE TOTAL $48.2M	50
					6 - Revise management plans for changes in values etc (need to be revised/resubmitted every 5 years). If changes required then report to CEP	Each plan revised every five years, takes 6wks per revision (field visits carried out under monitoring, action #4). Assume half were designated prior to 2050 and half after. (0.12FTE * 18-72plans * 83/5) + (0.5FTE * 18-72plans * 50/5)	126 - 503 OFC FTE TOTAL $9.7M – 38.9M	90

## Sheet: S9_Protect_species
Strategy	Approximate total cost ($USD)	Likelihood of success (%)	Threat	Objective and details	Action	Details and cost over time	Approximate total cost of action by 2100	Likelihood of uptake (%)
Managing and protecting species	APPROX COST RANGE = $321M – 655.9M APPROX TOTAL COST = $436.7M	(85% for 1st aim, 60% for 2nd aim)	Any/all (depending on why the taxa is vulnerable)	Reduce threatening impacts on taxa identified as threatened (in decline or at-risk) by 2100. 1. Identify and protect threatened species (assume 10 - 15 species to be identified and listed under this strategy) 2. Prevent extinction of native species in-situ	1 - Red-listing of species workshop and gap analyses	$100,000 (+$100,000 time in kind) + 0.5 FTE, every 10 years (to organise workshop and do post workshop analysis/reporting) $100k + 0.5 OFC FTE for yr 1 + $100k * (83/10) + 0.5 OFC FTE * (83/10)	5 OFC FTE+ $930K TOTAL $1.3M	95
					2 - Designate specially protected species through CEP	1 yr FTE every 5 years for 20 yrs then every 10 years thereafter 1 * 5 + 1 * (63/10)	11 OFC FTE TOTAL $850.3k	70
					3 - Develop and write recovery plans. Include developing decision making and management system to be in place in case of disease outbreak that would affect species of concern	1yr FTE after each red-listing workshop (assume 1-2 recovery plans to write each time) 1FTE * 9 workshops	9 OFC FTE TOTAL $695.7k	95
					4 - Apply red list criteria for species assessment & engage IUCN to red-list the species (in addition to CEP specially protected species)	Engage appropriate NGOs and bodies to provide further moral and financial support (pressure). 2FTE plus travel costs	2 OFC FTE + 100K TOTAL $254.6k	85
					5 - Develop in-situ management guidelines and policies through CEP	Engage with CEP and ATS to develop in-situ management guidelines and polices. See calculations for ‘influence ATS’ (#6) in: ‘manage non-native species and disease’ strategy	$600k + 7 OFC FTE TOTAL $1.1M	80
					6 - Baseline biodiversity surveys	Surveys needed to better understand current and historical distributions and trends of native species to feed into EIA and the decision to manage native species (can help identify species at risk). NOTE: a lot of the actions kick off in yr1, so surveys should be starting by the time first recovery plans are being developed etc. See calculations for ‘baseline surveys’ (#2) in ‘manage non-native sp…	540 - 1080 ANT FTE + 1080 – 2160 LSUM berths + $1.65M lab costs TOTAL $226.7M – 451.8M	60
					7 - EIA for species translocations, ex-situ conservation and management (must consider impacts on other species etc)	Risk and feasibility assessment of species at risk and whether species could benefit from in/ex-situ conservation (similar to invasive species risk management) and whether other native species would be impacted e.g. qualitative network modelling. Assume this will be necessary for 10 – 15 species. Field surveys carried out in action #6, additional 6mths of desktop work to undertake the EIA for eac…	5 – 8 OFC FTE TOTAL $386.5k – 618.4k	65
					8 - Protect and monitor species of concern according to recovery plan (actions #8 -#12 are implementing the recovery plan)	Including monitoring. This may include explicit management of native species that are impacting on the species of concern (e.g. fencing fur seals out of moss beds if species of interest resides there). CEP has precedence for protocols and costs of implementing recover plans. Means for protecting if affected outside the region, e.g. birds ACAP. Initially - 0.5 FTE per listed species of desk work (…	5 – 8 OFC FTE + 133 – 200 ANT FTE + 532 – 798 SSUM berths + $6.7M – $10M lab costs TOTAL $66.5M – 99.9M	70
					9 - Managed translocations (consider relocating species at risk of local extinction to safer sites – e.g. sites less impacted by climate change, invasive species, disturbance, pathogen etc). Contingency action if no other option.	Assume 1-5 translocations undertaken in the next 83yrs. 1FTE per species to research appropriate translocation sites and transportation methods, field team of anywhere between 2 (plants or inverts) – 10 (charismatic megafauna) field personnel to undertake the translocation for 1 season. + intracontinental flight per species (assume shipping is too slow for megafauna), though inverts/plants may be…	1 – 5 OFC FTE + 1 – 13 ANT FTE + 2 – 50 SSUM berths + $5k - $250k equipment + $22.9k - $114.5k intracontinental flights TOTAL $393.2k – 6.4M	40
					10 - Ex-situ conservation - assume re-introduction to Antarctica. Captive breeding for charismatic species with a severe disease outbreak threatening important populations or even entire species, e.g. Adelie penguins, seals, snow petrels, greater sheathbill may be at risk. Considered a contingency action if other actions fail.	Cost using a range (e.g. small and large habitat requirements or small or large bird). Cost of implementation can be derived using cases of American condors and Tasmanian devil examples. Assume 1-5 cases of ex-situ conservation over the 83yr period. Estimated as below using Tassie Devils & Condors: 2 FTE per species to examine EIA of implementing ex-situ conservation (link to action #7), organisi…	3 – 15 OFC FTE + 5 – 25 ANT FTE + + 20 – 100 SSUM berths + $269k – $1.35M intercontinental flights + $150k - $750k (equipment/operating) + $12.25 – $61.25M captive breeding + $1.2M - $6M media costs TOTAL $16.3M – 81.7M	60
					11 - Seed banks, spores, tissue culture, drying/preserving by low temps for plants that are threatened with extinction or severe population decline (also useful to establish seed bank for all endemic species if funds available)	Assume this is required for 5-10 events. Millennium seedbank of subantarctic plants provides a precedent for this action, though require an analysis to determine where the sample are kept. For new samples - costs largely logistics of collecting samples. Some costs for storage (-20 to -80° freezers for most terrestrial species). Estimated based on field season costs for 5-10 events/occurrences, as…	5 – 10 OFC FTE + 2.5 – 5 ANT FTE + 10 – 20 SSUM berths + $5k - $10 equipment + $40k - $200k tissue culture costs TOTAL $1.6M – 3.2M	80
					12 - Cultures and soil samples for simple organisms – communities rather than singular threatened species. Potential for costs to be offset by making material available for biotechnology screening	No cost info given during workshop, estimated as below: Assume this is required for 5 – 10 events. Assume same field costs & in-kind storage as collecting for seedbanks + ongoing FTE to maintain cultures (0.1FTE ongoing). Assume half the samples collected pre 2050 and half after. Prepare: 1 OFC FTE * (5 – 10 occurrences) Field: + 0.25 * 2 ANT FTE * (5 – 10) Maintain: + [0.1 * (2.5 – 5) * 83] + [0…	38 – 77 OFC FTE + 2.5 – 5 ANT FTE + 10 – 20 SSUM berths + $5k - $10 equipment TOTAL $4.1M – 8.2M	80
					13 – Revise Recovery Plans	Revisions of recovery plans needed every 5yrs to ensure recent information is incorporated and management strategy is optimal. 0.12FTE (6wks) required per revision (assume if multiple species designated at the same workshop they can manage revising both recovery plans within the 6wk period) Assume half of species designated pre 2050 and half after: 0.12FTE * (5 – 7.5 events) * (83/5yrs) + 0.12FTE…	16 – 24 OFC FTE TOTAL $1.2M – 1.9M	70

[truncated: 4 more sheets: S10_Human_activities, S11_Influence_ext_pol, S12_All_strats_excl_IEP, S13_All_strats]
